# Supplementary material
Source: PubMed Central journal article supplement (PMC2756549)
Supplement: mmc1.pdf [file mmc1.pdf]

AJHG, Volume 85

## **Supplemental Data**

**A Common Variation in EDAR Is a Genetic**

**Determinant of Shovel-Shaped Incisors**

**Ryosuke Kimura, Tetsutaro Yamaguchi, Mayako Takeda, Osamu Kondo, Takashi Toma, Kuniaki Haneji, Tsunehiko Hanihara, Hirotaka Matsukusa, Shoji Kawamura, Koutaro Maki, Motoki Osawa, Hajime Ishida, and Hiroki Oota**

Table S1. Summary of dental morphology data.

| Item <sup>a</sup> | Tokyo (n = 102) |      |                 |      | Sakishima (n = 100) |      |                 |      | Student's t test <sup>b</sup> |          |          |        |          |          |
|-------------------|-----------------|------|-----------------|------|---------------------|------|-----------------|------|-------------------------------|----------|----------|--------|----------|----------|
|                   | Male (n = 25)   |      | Female (n = 77) |      | Male (n = 43)       |      | Female (n = 57) |      | M vs F                        | TM vs TF | SM vs SF | T vs S | TM vs SM | TF vs SF |
|                   | Mean            | SD   | Mean            | SD   | Mean                | SD   | Mean            | SD   |                               |          |          |        |          |          |
| SH                | 2.59            | 1.14 | 3.06            | 1.00 | 2.68                | 0.96 | 2.89            | 0.99 |                               |          |          |        |          |          |
| DSH               | 1.45            | 0.74 | 1.77            | 1.16 | 1.31                | 0.92 | 2.15            | 1.28 | *                             |          | **       |        |          |          |
| UI1 BL            | 7.05            | 0.69 | 6.86            | 0.60 | 7.23                | 0.68 | 7.11            | 0.69 |                               |          |          |        |          |          |
| UI1 MD            | 8.74            | 0.65 | 8.43            | 0.48 | 8.70                | 0.49 | 8.65            | 0.46 |                               |          |          |        |          | *        |
| UI2 BL            | 6.56            | 0.64 | 6.25            | 0.58 | 6.69                | 0.44 | 6.43            | 0.60 | **                            |          |          |        |          |          |
| UI2 MD            | 7.35            | 0.64 | 7.13            | 0.54 | 7.27                | 0.52 | 7.22            | 0.45 |                               |          |          |        |          |          |
| UC BL             | 8.44            | 0.72 | 7.83            | 0.75 | 8.15                | 0.61 | 7.93            | 0.49 | **                            | *        |          |        |          |          |
| UC MD             | 8.13            | 0.49 | 7.74            | 0.42 | 8.26                | 0.42 | 8.03            | 0.33 | ***                           | **       | *        | ***    |          | ***      |
| UP1 BL            | 9.78            | 0.55 | 9.59            | 0.53 | 9.92                | 0.52 | 9.70            | 0.47 | *                             |          |          |        |          |          |
| UP1 MD            | 7.65            | 0.52 | 7.51            | 0.54 | 7.55                | 0.42 | 7.59            | 0.42 |                               |          |          |        |          |          |
| UP2 BL            | 9.70            | 0.56 | 9.32            | 0.62 | 9.66                | 0.56 | 9.47            | 0.58 | *                             |          |          |        |          |          |
| UP2 MD            | 7.22            | 0.61 | 6.96            | 0.44 | 7.11                | 0.45 | 7.11            | 0.42 |                               |          |          |        |          |          |
| UM1 BL            | 11.45           | 0.72 | 11.26           | 0.70 | 11.68               | 0.62 | 11.41           | 0.45 | *                             |          |          |        |          |          |
| UM1 MD            | 10.70           | 0.75 | 10.31           | 0.63 | 10.61               | 0.66 | 10.52           | 0.48 | *                             |          |          |        |          |          |
| UM2 BL            | 11.75           | 0.71 | 11.07           | 0.68 | 11.56               | 0.92 | 11.36           | 0.56 | **                            | **       |          |        |          |          |
| UM2 MD            | 10.12           | 0.92 | 9.58            | 0.59 | 10.22               | 0.65 | 10.18           | 0.61 | *                             | *        |          | ***    |          | ***      |
| LI1 BL            | 5.95            | 0.40 | 5.77            | 0.41 | 5.94                | 0.49 | 5.87            | 0.66 |                               |          |          |        |          |          |
| LI1 MD            | 5.76            | 0.34 | 5.43            | 0.36 | 5.57                | 0.30 | 5.56            | 0.35 | *                             | **       |          |        |          |          |
| LI2 BL            | 6.40            | 0.48 | 6.13            | 0.46 | 6.46                | 0.48 | 6.26            | 0.48 | **                            |          |          |        |          |          |
| LI2 MD            | 6.35            | 0.48 | 5.95            | 0.38 | 6.13                | 0.29 | 6.12            | 0.36 | *                             | ***      |          |        |          |          |
| LC BL             | 7.93            | 0.51 | 7.33            | 0.51 | 7.54                | 0.55 | 7.11            | 0.56 | ***                           | ***      | **       |        | *        |          |
| LC MD             | 7.10            | 0.37 | 6.58            | 0.43 | 7.18                | 0.35 | 6.82            | 0.26 | ***                           | ***      | ***      | ***    |          | **       |
| LP1 BL            | 8.28            | 0.46 | 7.95            | 0.50 | 8.37                | 0.55 | 8.03            | 0.46 | ***                           | *        | **       |        |          |          |
| LP1 MD            | 7.60            | 0.51 | 7.37            | 0.42 | 7.44                | 0.43 | 7.28            | 0.38 |                               |          |          |        |          |          |
| LP2 BL            | 8.66            | 0.54 | 8.32            | 0.54 | 8.79                | 0.64 | 8.67            | 0.48 | *                             |          |          | **     |          | **       |
| LP2 MD            | 7.56            | 0.60 | 7.32            | 0.45 | 7.46                | 0.55 | 7.36            | 0.41 |                               |          |          |        |          |          |
| LM1 BL            | 10.88           | 0.74 | 10.53           | 0.68 | 11.17               | 0.68 | 11.02           | 0.41 | **                            |          |          | ***    |          | ***      |
| LM1 MD            | 11.85           | 0.59 | 11.29           | 0.55 | 11.53               | 0.66 | 11.41           | 0.51 | **                            | ***      |          |        |          |          |
| LM2 BL            | 10.57           | 0.68 | 10.25           | 0.64 | 10.62               | 0.74 | 10.74           | 0.56 |                               |          |          | *      |          | **       |
| LM2 MD            | 11.37           | 0.83 | 10.74           | 0.62 | 10.61               | 0.64 | 10.51           | 0.55 |                               | *        |          | *      | *        |          |

<sup>a</sup>Abbreviations: SH, shoveling grade; DSH, double-shovelling grade; U, upper; L, lower; I, incisor; C, canine; P, premolar; M, molar; BL, buccolingual diameter (mm); MD, mesiodistal diameter (mm). <sup>b</sup>Abbreviations: M, male; F, female; T, Tokyo; S, Sakishima. \*P < 0.01; \*\*P < 0.001; \*\*\*P < 0.0001.

Table S2. Eigenvalues in PCA.

| PC   | Eigenvalue | Proportion | Cumulative |
|------|------------|------------|------------|
| PC1  | 12.86      | 45.94%     | 45.94%     |
| PC2  | 2.21       | 7.90%      | 53.84%     |
| PC3  | 1.76       | 6.28%      | 60.12%     |
| PC4  | 1.29       | 4.62%      | 64.75%     |
| PC5  | 0.92       | 3.28%      | 68.03%     |
| PC6  | 0.81       | 2.88%      | 70.91%     |
| PC7  | 0.76       | 2.72%      | 73.63%     |
| PC8  | 0.69       | 2.45%      | 76.08%     |
| PC9  | 0.61       | 2.16%      | 78.24%     |
| PC10 | 0.55       | 1.96%      | 80.20%     |
| PC11 | 0.50       | 1.78%      | 81.98%     |
| PC12 | 0.49       | 1.75%      | 83.73%     |
| PC13 | 0.43       | 1.53%      | 85.26%     |
| PC14 | 0.41       | 1.48%      | 86.74%     |
| PC15 | 0.38       | 1.37%      | 88.11%     |
| PC16 | 0.35       | 1.26%      | 89.37%     |
| PC17 | 0.33       | 1.17%      | 90.55%     |
| PC18 | 0.30       | 1.06%      | 91.61%     |
| PC19 | 0.29       | 1.05%      | 92.66%     |
| PC20 | 0.28       | 1.01%      | 93.67%     |
| PC21 | 0.27       | 0.97%      | 94.65%     |
| PC22 | 0.27       | 0.95%      | 95.60%     |
| PC23 | 0.26       | 0.93%      | 96.53%     |
| PC24 | 0.24       | 0.85%      | 97.37%     |
| PC25 | 0.21       | 0.76%      | 98.13%     |
| PC26 | 0.20       | 0.71%      | 98.84%     |
| PC27 | 0.18       | 0.65%      | 99.49%     |
| PC28 | 0.14       | 0.51%      | 100.00%    |

Table S3. Comparison of principal component scores between regions.

| PC  | Male (n = 68)  |       |                    |       | Female (n = 134)    |       |                    |       |
|-----|----------------|-------|--------------------|-------|---------------------|-------|--------------------|-------|
|     | Tokyo (n = 25) |       | Sakishima (n = 43) |       | Tokyo (n = 77)      |       | Sakishima (n = 57) |       |
|     | Mean           | SD    | Mean               | SD    | Mean                | SD    | Mean               | SD    |
| PC1 | 0.311          | 3.890 | -0.067             | 3.721 | -0.690 <sup>a</sup> | 3.404 | 0.846 <sup>a</sup> | 2.708 |
| PC2 | -0.326         | 1.575 | 0.172              | 1.460 | 0.068               | 1.467 | -0.138             | 1.603 |
| PC3 | 0.168          | 1.282 | -0.065             | 1.236 | -0.122              | 1.146 | -0.025             | 1.484 |
| PC4 | 0.001          | 1.028 | -0.267             | 1.022 | -0.209              | 1.125 | 0.088              | 0.940 |

<sup>a</sup>Significantly different between regions ( $P < 0.01$ ).

Table S4. Genotype and allele frequencies.

| SNP rs     | Chr: position | Allele  | Tokyo |                 |                 |                 | Sakishima      |                |     |                 | P  |                 |                 |                |                |
|------------|---------------|---------|-------|-----------------|-----------------|-----------------|----------------|----------------|-----|-----------------|----|-----------------|-----------------|----------------|----------------|
|            |               |         | n     | n <sub>00</sub> | n <sub>01</sub> | n <sub>11</sub> | p <sub>0</sub> | p <sub>1</sub> | n   | n <sub>00</sub> |    | n <sub>01</sub> | n <sub>11</sub> | p <sub>0</sub> | p <sub>1</sub> |
| rs3827760  | 2: 108880033  | 0:T 1:C | 102   | 7               | 36              | 59              | 0.245          | 0.755          | 100 | 7               | 43 | 50              | 0.285           | 0.715          | 0.36           |
| rs12623957 | 2: 108880086  | 0:C 1:T | 102   | 2               | 32              | 68              | 0.176          | 0.823          | 100 | 2               | 40 | 58              | 0.220           | 0.780          | 0.27           |
| rs10495392 | 1: 235489612  | 0:C 1:T | 102   | 0               | 15              | 87              | 0.074          | 0.926          | 99  | 3               | 28 | 68              | 0.172           | 0.828          | 2.6E-03        |
| rs17265387 | 2: 199957247  | 0:T 1:C | 102   | 1               | 10              | 91              | 0.059          | 0.941          | 100 | 2               | 14 | 84              | 0.090           | 0.910          | 0.23           |
| rs17075469 | 4: 185363004  | 0:C 1:G | 99    | 0               | 14              | 85              | 0.071          | 0.929          | 98  | 6               | 39 | 53              | 0.260           | 0.740          | 4.0E-07        |
| rs2071652  | 6: 29743296   | 0:T 1:C | 102   | 2               | 32              | 68              | 0.176          | 0.824          | 100 | 0               | 5  | 95              | 0.025           | 0.975          | 4.6E-07        |
| rs555766   | 10: 78685945  | 0:T 1:C | 101   | 1               | 10              | 90              | 0.059          | 0.941          | 100 | 4               | 29 | 67              | 0.185           | 0.815          | 1.2E-04        |

rs3827760 and rs12623957 correspond to *EDAR* T1540C and C1487T, respectively. Chromosome positions are according to NCBI Build 36.3. Abbreviations: n, number of genotyped individuals; n<sub>00</sub>, n<sub>01</sub> and n<sub>11</sub>, number of individuals with each genotype; p<sub>0</sub> and p<sub>1</sub>, allele frequency; P, P value of the chi-square test for comparison in the allele frequency between populations.

Table S5. Correlations between SNPs.

|            | rs3827760 | rs10495392 | rs17265387 | rs17075469 | rs2071652 | rs555766 |
|------------|-----------|------------|------------|------------|-----------|----------|
| rs3827760  |           | 0.137      | 0.143      | 0.083      | -0.069    | 0.069    |
| rs10495392 | 0.053     |            | -0.063     | 0.058      | -0.101    | 0.050    |
| rs17265387 | 0.042     | 0.376      |            | 0.002      | -0.032    | -0.034   |
| rs17075469 | 0.247     | 0.418      | 0.973      |            | -0.116    | -0.058   |
| rs2071652  | 0.327     | 0.155      | 0.651      | 0.103      |           | -0.048   |
| rs555766   | 0.333     | 0.481      | 0.631      | 0.422      | 0.498     |          |

rs3827760 corresponds to *EDAR* T1540C. The correlation coefficients are shown in the upper-right of the matrix, and P values are in the lower-left.
